# Supplementary material for: PLEK2 Gene Upregulation Might Independently Predict Shorter Progression-Free Survival in Lung Adenocarcinoma
Source: PubMed Central journal article supplement — Technol Cancer Res Treat. 2020 Oct 21;19:1533033820957030. doi: 10.1177/1533033820957030 (PMC7588770; doi:10.1177/1533033820957030), 2020-10-21
Supplement: Supplementary_Table_2_3.pdf [file Supplementary_Table_2_3.pdf]

Supplementary Table 2. Univariate and multivariate analysis of DSS in LUAD patients

| Parameters                              | Univariate analysis |       |                        |       | Multivariate analysis |       |                        |       |
|-----------------------------------------|---------------------|-------|------------------------|-------|-----------------------|-------|------------------------|-------|
|                                         | <i>p</i>            | HR    | 95%CI<br>(lower/upper) |       | <i>p</i>              | HR    | 95%CI<br>(lower/upper) |       |
| <b>Age</b> (Continuous)                 | 0.297               | 0.990 | 0.972                  | 1.009 |                       |       |                        |       |
| <b>Gender</b>                           |                     |       |                        |       |                       |       |                        |       |
| Male (N=217)                            |                     | 1.000 |                        |       |                       |       |                        |       |
| Female (N=252)                          | 0.853               | 1.036 | 0.713                  | 1.505 |                       |       |                        |       |
| <b>Smoking history</b>                  |                     |       |                        |       |                       |       |                        |       |
| 2/3/4/5 (N=385)                         |                     | 1.000 |                        |       |                       |       |                        |       |
| 1 (N=69)                                | 0.873               | 0.956 | 0.553                  | 1.655 |                       |       |                        |       |
| <b>Pathological stages</b>              |                     |       |                        |       |                       |       |                        |       |
| III/IV (N=93)                           |                     | 1.000 |                        |       |                       |       |                        |       |
| I/II (N=368)                            | <b>&lt;0.001</b>    | 0.408 | 0.275                  | 0.607 | 0.991                 | 0.997 | 0.574                  | 1.729 |
| <b>Pathological T status</b>            |                     |       |                        |       |                       |       |                        |       |
| T3/T4 (N=55)                            |                     | 1.000 |                        |       |                       |       |                        |       |
| T1/T2 (N=410)                           | <b>0.005</b>        | 0.483 | 0.291                  | 0.804 | 0.265                 | 0.723 | 0.409                  | 1.278 |
| <b>Pathological N status</b>            |                     |       |                        |       |                       |       |                        |       |
| N1/N2/N3 (N=165)                        |                     | 1.000 |                        |       |                       |       |                        |       |
| N0 (N=323)                              | <b>&lt;0.001</b>    | 0.367 | 0.252                  | 0.534 | <b>&lt;0.001</b>      | 0.422 | 0.271                  | 0.657 |
| <b>Pathological M status</b>            |                     |       |                        |       |                       |       |                        |       |
| M1 (N=21)                               |                     | 1.000 |                        |       |                       |       |                        |       |
| M0 (N=306)                              | <b>0.008</b>        | 0.408 | 0.210                  | 0.790 | 0.424                 | 0.708 | 0.303                  | 1.653 |
| <b>Residual tumors</b>                  |                     |       |                        |       |                       |       |                        |       |
| Yes (N=13)                              |                     | 1.000 |                        |       |                       |       |                        |       |
| No (N=305)                              | <b>&lt;0.001</b>    | 0.200 | 0.099                  | 0.404 | <b>0.002</b>          | 0.283 | 0.129                  | 0.622 |
| <b>PLEK2 expression</b><br>(Continuous) |                     |       |                        |       |                       |       |                        |       |
|                                         | <b>&lt;0.001</b>    | 1.467 | 1.236                  | 1.740 | <b>0.001</b>          | 1.355 | 1.131                  | 1.623 |

Bold indicates  $p < 0.05$ .
