# Supplementary material for: PLEK2 Gene Upregulation Might Independently Predict Shorter Progression-Free Survival in Lung Adenocarcinoma
Source: PubMed Central journal article supplement — Technol Cancer Res Treat. 2020 Oct 21;19:1533033820957030. doi: 10.1177/1533033820957030 (PMC7588770; doi:10.1177/1533033820957030), 2020-10-21
Supplement: Supplementary_Table_3_1.pdf [file Supplementary_Table_3_1.pdf]

**Supplementary Table 3. Univariate and multivariate analysis of DFS in LUAD patients**

| Parameters                   | Univariate analysis |       |                        |       | Multivariate analysis |       |                        |       |
|------------------------------|---------------------|-------|------------------------|-------|-----------------------|-------|------------------------|-------|
|                              | <i>p</i>            | HR    | 95%CI<br>(lower/upper) |       | <i>p</i>              | HR    | 95%CI<br>(lower/upper) |       |
| <b>Age</b> (Continuous)      | 0.105               | 1.018 | 0.996                  | 1.041 |                       |       |                        |       |
| <b>Gender</b>                |                     |       |                        |       |                       |       |                        |       |
| Male (N=130)                 |                     | 1.000 |                        |       |                       |       |                        |       |
| Female (N=170)               | 0.346               | 0.818 | 0.538                  | 1.243 |                       |       |                        |       |
| <b>Smoking history</b>       |                     |       |                        |       |                       |       |                        |       |
| 2/3/4/5 (N=243)              |                     | 1.000 |                        |       |                       |       |                        |       |
| 1 (N=50)                     | 0.275               | 1.345 | 0.790                  | 2.290 |                       |       |                        |       |
| <b>Pathological stages</b>   |                     |       |                        |       |                       |       |                        |       |
| III/IV (N=29)                |                     | 1.000 |                        |       |                       |       |                        |       |
| I/II (N=267)                 | 0.575               | 1.247 | 0.576                  | 2.702 |                       |       |                        |       |
| <b>Pathological T status</b> |                     |       |                        |       |                       |       |                        |       |
| T3/T4 (N=23)                 |                     | 1.000 |                        |       |                       |       |                        |       |
| T1/T2 (N=276)                | <b>0.011</b>        | 0.439 | 0.233                  | 0.827 | <b>0.009</b>          | 0.421 | 0.220                  | 0.804 |
| <b>Pathological N status</b> |                     |       |                        |       |                       |       |                        |       |
| N1/N2/N3 (N=73)              |                     | 1.000 |                        |       |                       |       |                        |       |
| N0 (N=218)                   | 0.979               | 0.994 | 0.617                  | 1.600 |                       |       |                        |       |
| <b>Residual tumors</b>       |                     |       |                        |       |                       |       |                        |       |
| Yes (N=3)                    |                     | 1.000 |                        |       |                       |       |                        |       |
| No (N=223)                   | <b>0.018</b>        | 0.244 | 0.076                  | 0.781 | <b>0.019</b>          | 0.248 | 0.077                  | 0.797 |
| <b>PLEK2 expression</b>      |                     |       |                        |       |                       |       |                        |       |
| (Continuous)                 | <b>0.001</b>        | 1.377 | 1.143                  | 1.658 | <b>0.001</b>          | 1.364 | 1.129                  | 1.649 |

Bold indicates  $p < 0.05$ .
